# Supplementary material
Source: publisher figshare collection journal article supplement (https://acs.figshare.com/ndownloader/files/26905041)
Supplement: Supplementary file 1 [file 26905041]

## Sheet: Primer
	Supplemental Table S2 List of primer for qRT-PCR.
	Accession NO.	Protein name	Abbre.name	Forward primer	Reverse primer
	AAA92681.1	Calmodulin [Cajanus cajan]	CALM1	ATGCTAAGGAGCTGAATG	CTCTTTAGTGTCCCTTTCT
	CAA78829.1	ABA-responsive protein [Pisum sativum]	ARP1	TTTTATCATGGGTGTCTTTG	AGCCCTGGTCCTCCTACT
	CAG44501.1	lipoxygenase LOXN3 [Pisum sativum]	LOXN3	GGGAGATGATTGCTGG	GCTTCAAAGTTCCGTTAT
	CAA78515.1	dehydrin-cognate (macronuclear) [Pisum sativum]	DHN	GGTGCCAGTTGAGAAAGT	GGAACATGAGCAGCGACA
